# Supplementary material for: Monomer, clusters, liquid: an integrated spectroscopic study of methanol condensation
Source: Royal Society of Chemistry journal article supplement (doi:10.1039/c0cp02485f), 2011-01-01
Supplement: c0cp02485f.pdf [file c0cp02485f.pdf]

Monomer, clusters, liquid: An integrated spectroscopic study of methanol condensation

Hartawan Laksmono, Shinobu Tanimura, Heather C. Allen, Gerald Wilemski, Mark S. Zahniser, Joanne H. Shorter, David D. Nelson, J. Barry McManus, and Barbara E. Wyslouzil

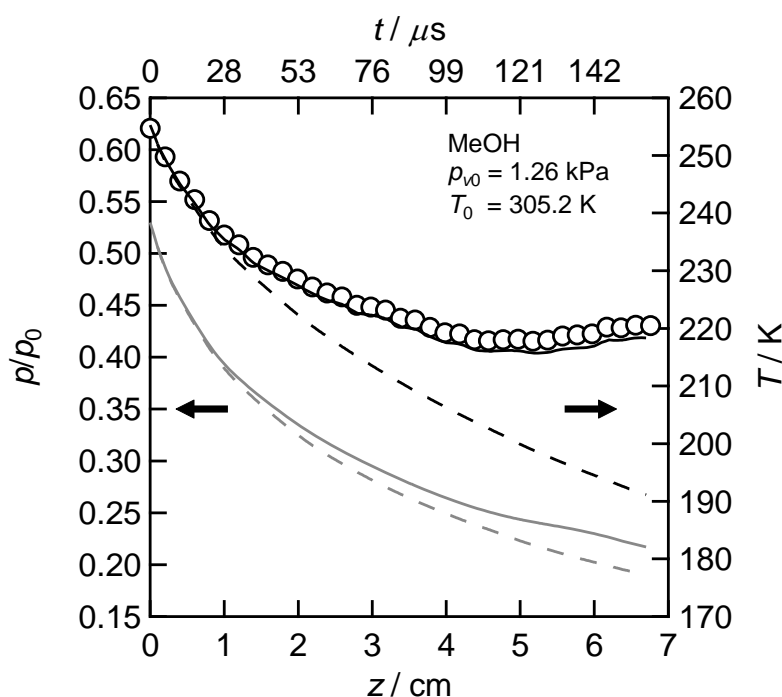

FIG. S1: The measured pressure ratios and temperatures for the condensing flow of a dilute MeOH mixture where  $p_{v0} = 1.26 \text{ kPa}$ . The upper axis gives the flow time corresponding to the values of  $z$  on the lower axis, where  $z = t = 0$  corresponds to the throat. The expansion started from  $p_0 = 59.6 \text{ kPa}$  and the other experimental conditions are noted in each figure. The solid gray line is the measured pressure ratios  $p/p_0$ , while the dashed gray line is the pressure ratio expected for an isentropic expansion of the gas mixture in the absence of vapor phase association. The open circles, black dashed line, and black solid line, represent  $T_{\text{TDLAS}}$ , the expected temperature for an isentropic expansion of the gas (no clustering), and the centerline temperature  $T$ , respectively.  $T$  was calculated as described in Sec. IID.

Table S1. A summary of the SAXS experimental results for  $p_{v0} = 0.87, 1.26, \text{ and } 2.09$  kPa.

| $z / \text{cm}$     | $\langle r \rangle / \text{nm}$ | $\sigma / \text{nm}$ | $N / \text{cm}^{-3}$  |
|---------------------|---------------------------------|----------------------|-----------------------|
| $p_{v0} = 0.87$ kPa |                                 |                      |                       |
| 2005                |                                 |                      |                       |
| 5.4                 | 4.2                             | 1.5                  | $9.00 \times 10^{11}$ |
| 5.6                 | 4.8                             | 1.6                  | $1.02 \times 10^{12}$ |
| 5.8                 | 5.2                             | 1.7                  | $1.27 \times 10^{12}$ |
| 6                   | 5.9                             | 1.8                  | $1.28 \times 10^{12}$ |
| 6.2                 | 6.4                             | 1.8                  | $1.33 \times 10^{12}$ |
| 6.4                 | 6.9                             | 1.8                  | $1.22 \times 10^{12}$ |
| 6.6                 | 7.2                             | 1.9                  | $1.27 \times 10^{12}$ |
| 6.8                 | 7.5                             | 1.9                  | $1.18 \times 10^{12}$ |
| 7                   | 7.7                             | 2.0                  | $1.22 \times 10^{12}$ |
| 2007                |                                 |                      |                       |
| 5.5                 | 4.2                             | 1.7                  | $1.10 \times 10^{12}$ |
| 6                   | 5.9                             | 1.9                  | $1.26 \times 10^{12}$ |
| 6.5                 | 7.2                             | 1.9                  | $1.12 \times 10^{12}$ |
| 7                   | 7.9                             | 1.9                  | $1.00 \times 10^{12}$ |
| $p_{v0} = 1.26$ kPa |                                 |                      |                       |
| 2005                |                                 |                      |                       |
| 4.8                 | 5.4                             | 1.9                  | $4.20 \times 10^{11}$ |
| 5                   | 5.7                             | 2.1                  | $6.82 \times 10^{11}$ |
| 5.2                 | 6.7                             | 2.1                  | $6.91 \times 10^{11}$ |
| 5.4                 | 7.2                             | 2.2                  | $8.79 \times 10^{11}$ |
| 5.6                 | 7.9                             | 2.3                  | $9.32 \times 10^{11}$ |
| 5.8                 | 8.6                             | 2.3                  | $8.94 \times 10^{11}$ |
| 6                   | 9.2                             | 2.3                  | $8.47 \times 10^{11}$ |
| 6.2                 | 9.5                             | 2.3                  | $8.45 \times 10^{11}$ |
| 6.4                 | 9.8                             | 2.4                  | $8.29 \times 10^{11}$ |
| 6.6                 | 10.1                            | 2.4                  | $8.03 \times 10^{11}$ |
| 6.8                 | 10.2                            | 2.5                  | $7.83 \times 10^{11}$ |
| 7                   | 10.4                            | 2.5                  | $7.76 \times 10^{11}$ |
| 2007                |                                 |                      |                       |
| 4.7                 | 3.7                             | 2.0                  | $5.38 \times 10^{11}$ |

|   |     |     |                       |
|---|-----|-----|-----------------------|
| 5 | 5.0 | 2.2 | $7.61 \times 10^{11}$ |
| 6 | 8.9 | 2.5 | $8.12 \times 10^{11}$ |

---

---

| $z / \text{cm}$ | $\langle r \rangle / \text{nm}$ | $\sigma / \text{nm}$ | $N / \text{cm}^{-3}$  |
|-----------------|---------------------------------|----------------------|-----------------------|
| 7               | 10.3                            | 2.7                  | $7.26 \times 10^{11}$ |

$p_{v0} = 2.09 \text{ kPa}$

2005

|     |      |     |                       |
|-----|------|-----|-----------------------|
| 4.5 | 6.7  | 2.7 | $3.55 \times 10^{11}$ |
| 5   | 9.5  | 3.0 | $4.66 \times 10^{11}$ |
| 5.5 | 11.8 | 3.1 | $4.71 \times 10^{11}$ |
| 6   | 13.1 | 3.2 | $4.49 \times 10^{11}$ |
| 6.5 | 13.7 | 3.2 | $4.30 \times 10^{11}$ |
| 7   | 14.1 | 3.3 | $4.07 \times 10^{11}$ |

2007

|     |      |     |                       |
|-----|------|-----|-----------------------|
| 4.2 | 4.5  | 2.7 | $2.31 \times 10^{11}$ |
| 4.5 | 5.4  | 2.8 | $3.40 \times 10^{11}$ |
| 4.8 | 6.8  | 3.1 | $3.91 \times 10^{11}$ |
| 5   | 8.8  | 3.4 | $4.62 \times 10^{11}$ |
| 6   | 13.2 | 3.4 | $4.33 \times 10^{11}$ |
| 7   | 14.4 | 3.6 | $3.88 \times 10^{11}$ |

---
